# Supplementary material for: Low circulating adropin levels in late-middle aged African Americans with poor cognitive performance
Source: bioRxiv or medRxiv preprint supplement (doi:10.1101/2021.12.09.21267550), 2023-09-29
Supplement: Supplementary file [file media-1.pdf]

**Table S1.** Age, sex, body mass, and serum adropin concentrations of the 352 study participants.

| <b>Characteristics</b>               | <b>Sample size (n=352)</b> | <b>Mean <math>\pm</math> Std Deviation, range</b> |
|--------------------------------------|----------------------------|---------------------------------------------------|
| Age (years)                          | 352                        | 56.6 $\pm$ 4.4, 45 to 65                          |
| Females (%)                          | 352                        | 66.7%                                             |
| Body mass index (kg/m <sup>2</sup> ) | 351                        | 31.3 $\pm$ 6.9, 14.5 to 55.7                      |
| Serum adropin (ng/ml)                | 352                        | 3.24 $\pm$ 1.47, 0.15 to 8.5                      |
